# Supplementary figures and images for: Environmental Survey Meta-analysis Reveals Hidden Diversity among Unicellular Opisthokonts
Source: PubMed Central journal article supplement — Mol Biol Evol. 2013 Jan 16;30(4):802–5. doi: 10.1093/molbev/mst006 (PMC3603316; doi:10.1093/molbev/mst006), 2013-01-16

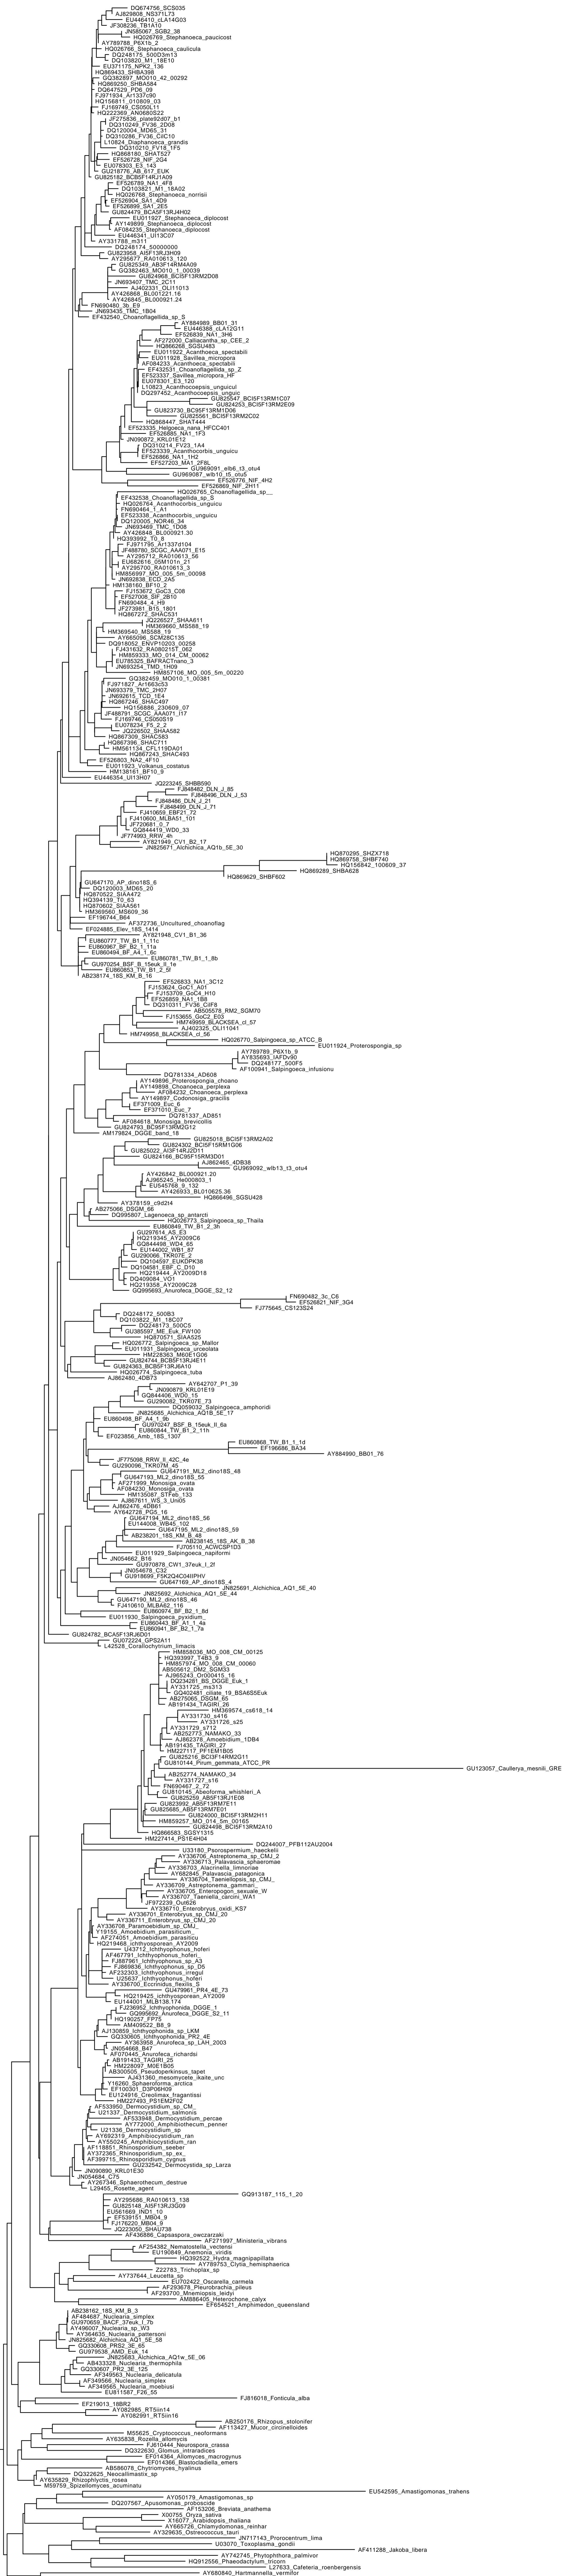

Supplement: supp_mst006_mst006_del_Campo_2012_MBE_sup3.pdf [file supp_mst006_mst006_del_Campo_2012_MBE_sup3.pdf]
